# Supplementary material
Source: MDPI journal article supplement (https://www.mdpi.com/2073-4395/13/8/2052)
Supplement: s1 [file s1]

## Supplementary information

**Table S1.** Summary of transcriptome sequencing results.

| Sample | Raw Reads | Clean Reads (%)   | Total Mapped      | Multiple Mapped  | Uniquely Mapped   | Mapped to Gene    |
|--------|-----------|-------------------|-------------------|------------------|-------------------|-------------------|
| CK1_3d | 47587866  | 45172624 (94.92%) | 43508153 (96.32%) | 2110132 (4.85%)  | 41398021 (95.15%) | 39807397 (96.16%) |
| CK2_3d | 52691688  | 49838978 (94.58%) | 48005020 (96.32%) | 1984745 (4.13%)  | 46020275 (95.87%) | 44186681 (96.02%) |
| CK3_3d | 46693958  | 44085536 (94.41%) | 42448430 (96.29%) | 2164413 (5.10%)  | 40284017 (94.90%) | 38536730 (95.66%) |
| T1_3d  | 46802166  | 44327318 (94.71%) | 42661016 (96.24%) | 2314943 (5.43%)  | 40346073 (94.57%) | 38564447 (95.58%) |
| T2_3d  | 53419312  | 50667326 (94.84%) | 48865181 (96.44%) | 6104049 (12.49%) | 42761132 (87.51%) | 40368190 (94.40%) |
| T3_3d  | 49736442  | 47153318 (94.8%)  | 45369714 (96.22%) | 2186539 (4.82%)  | 43183175 (95.18%) | 41242991 (95.51%) |
| CK1_7d | 52226874  | 49542572 (94.86%) | 47561164 (96.00%) | 1566792 (3.29%)  | 45994372 (96.71%) | 44110312 (95.90%) |
| CK2_7d | 50044580  | 47454444 (94.82%) | 45513468 (95.91%) | 1545095 (3.39%)  | 43968373 (96.61%) | 42245602 (96.08%) |
| CK3_7d | 53528986  | 50562606 (94.45%) | 48601499 (96.12%) | 1709254 (3.52%)  | 46892245 (96.48%) | 45057946 (96.09%) |
| T1_7d  | 52171250  | 49183054 (94.27%) | 47009727 (95.58%) | 1907244 (4.06%)  | 45102483 (95.94%) | 43102722 (95.57%) |
| T2_7d  | 46930356  | 44313454 (94.42%) | 42585515 (96.10%) | 1845582 (4.33%)  | 40739933 (95.67%) | 38872240 (95.42%) |
| T3_7d  | 47898072  | 45013538 (93.97%) | 43250931 (96.08%) | 1681499 (3.89%)  | 41569432 (96.11%) | 39603874 (95.27%) |

**Table S2.** Heatmap data of differentially coexpressed genes for different pathways.

|                         | Gene_ID      | CK3d        | T3d         | CK7d        | T7d         | Description                                                                                            |
|-------------------------|--------------|-------------|-------------|-------------|-------------|--------------------------------------------------------------------------------------------------------|
| Chloroplast development | Os06g0229000 | 2.507144272 | 3.81647014  | 2.283935757 | 1.081524373 | Similar to FtsH protease (VAR2) (Zinc dependent protease)                                              |
|                         | Os06g0229066 | 2.492537311 | 4.204996382 | 2.531855759 | 1.085457835 | Similar to ATP-dependent zinc metalloprotease FTSH 6, chloroplastic                                    |
|                         | Os02g0680600 | 17.34856723 | 15.08299811 | 64.05759354 | 33.58087521 | 2-C-methyl-d-erythritol 2,4-cyclodiphosphate synthase, Isoprenoid biosynthesis, Chloroplast developmen |
|                         | Os01g0101700 | 3.169776747 | 3.556991544 | 85.36822722 | 43.28073072 | Similar to chaperone protein dnaJ 20                                                                   |
|                         | Os02g0553200 | 172.7114635 | 157.7783326 | 551.8094451 | 339.3388114 | Thylakoid membrane-bound ascorbate peroxidase, Tolerance to bacterial blight, Response to NaC          |
|                         | Os12g0182700 | 8.982173077 | 8.407778761 | 45.79026076 | 27.45719407 | Histone deacetylase superfamily protein                                                                |
|                         | Os05g0401100 | 139.0581501 | 85.6517255  | 315.0230744 | 195.9694535 | Protein of unknown function DUF477 family protein                                                      |
|                         | Os06g0348800 | 90.28883235 | 73.4614395  | 253.4926422 | 151.1852492 | Transfactor-like protein                                                                               |
|                         | Os09g0111100 | 1.383729502 | 1.277151768 | 2.261909662 | 1.334758024 | Cyclin D domain containing protein                                                                     |
|                         | Os04g0628900 | 7.59131165  | 6.33879206  | 58.20218817 | 27.04493927 | Cyclin-P1-1                                                                                            |
|                         | Os06g0115300 | 35.49985935 | 27.87177242 | 179.0650085 | 84.01542779 | Acyl-CoA-binding protein , Stress respons                                                              |

|                            |              |             |             |             |             |                                                                                                                                           |
|----------------------------|--------------|-------------|-------------|-------------|-------------|-------------------------------------------------------------------------------------------------------------------------------------------|
|                            | Os08g0162800 | 347.0337673 | 342.3995525 | 630.0081369 | 370.7295198 | Acyl-CoA-binding protein ,<br>Stress respons                                                                                              |
|                            | Os02g0646500 | 0.058197725 | 0.011522859 | 0.334494271 | 0.114423243 | Aldehyde dehydrogenase<br>domain containing protein                                                                                       |
| Photosystem                | Os07g0577600 | 1481.291402 | 1048.710528 | 3100.257693 | 1943.495819 | Similar to Type II chlorophyll<br>a/b binding protein from<br>photosystem I precursor                                                     |
|                            | Os03g0592500 | 6408.609013 | 4232.617052 | 11295.7397  | 6982.428744 | Similar to Photosystem II type<br>II chlorophyll a/b binding<br>protein (Fragment)                                                        |
|                            | Os12g0189400 | 1333.502322 | 824.1719244 | 3187.835239 | 1672.584076 | Similar to Photosystem I<br>reaction centre subunit N,<br>chloroplast precursor (PSI- N)                                                  |
|                            | Os07g0141400 | 2165.831133 | 1468.853431 | 4339.077506 | 2668.966742 | Similar to 23 kDa polypeptide<br>of photosystem II                                                                                        |
|                            | Os03g0343900 | 336.419979  | 210.5841748 | 976.6654263 | 377.706458  | Photosystem II PsbX domain<br>containing protein                                                                                          |
|                            | Os08g0200300 | 3428.544576 | 2762.394648 | 12637.34101 | 7920.877467 | Similar to Photosystem II 10<br>kDa polypeptide (Fragment)                                                                                |
|                            | Os05g0508900 | 101.1377499 | 61.76798813 | 229.8841095 | 135.7639563 | Similar to cDNA clone:001-<br>011-D03, full insert sequence                                                                               |
|                            | Os01g0552300 | 18.96129894 | 17.2674077  | 101.4454831 | 60.84359591 | Similar to Protein phosphatase-<br>2C                                                                                                     |
|                            | Os03g0857400 | 105.2878054 | 103.3158386 | 644.3733258 | 371.6947715 | tRNA-binding arm domain<br>containing protein                                                                                             |
|                            | Os03g0736600 | 31.10844078 | 21.68158806 | 87.19416658 | 53.03652163 | Similar to ATP synthase                                                                                                                   |
| Carbon fixation            | Os12g0292400 | 87.03334497 | 41.83009942 | 664.2381668 | 393.9199971 | Similar to Petunia ribulose 1,5-<br>biphosphate carboxylase small<br>subunit mRNA (clone pSSU<br>51), partial cds. (Fragment)             |
|                            | Os03g0169100 | 253.119171  | 201.9257432 | 485.2512088 | 303.7528336 | Ribulose-phosphate 3-<br>epimerase, chloroplast<br>precursor (EC 5.1.3.1)<br>(Pentose-5-phosphate 3-<br>epimerase) (PPE) (RPE)<br>(R5P3E) |
|                            | Os07g0176900 | 158.1458904 | 132.4165777 | 543.9058762 | 309.5479391 | Similar to Ribose-5-phosphate<br>isomerase precursor (EC<br>5.3.1.6)                                                                      |
|                            | Os03g0129300 | 851.1744377 | 631.3291556 | 3108.960916 | 1891.366772 | Similar to Glyceraldehyde-3-<br>phosphate dehydrogenase (EC<br>1.2.1.13) (Fragment)                                                       |
|                            | Os07g0412100 | 81.09768091 | 64.34328977 | 638.4340962 | 297.4783664 | Similar to Granule-bound<br>starch synthase Ib, chloroplast<br>precursor (EC 2.4.1.21)<br>(Fragment)                                      |
|                            | Os12g0271700 | 21.84086757 | 14.17734527 | 60.01392902 | 35.50277385 | Similar to prenyl transferase                                                                                                             |
|                            | Os06g0133000 | 0.00853361  | 0.025018458 | 0.898675061 | 0.384173613 | Granule-bound starch synthase,<br>Synthesis of amylose in<br>endosper                                                                     |
|                            | Os06g0160700 | 13.95553778 | 15.48820633 | 69.83219195 | 39.16469469 | Starch synthase, Starch<br>biosynthesi                                                                                                    |
| Chloroplast<br>degradation | Os10g0389300 | 1.18374822  | 0.923567041 | 0.655115016 | 2.0174147   | Similar to Red chlorophyll<br>catabolite reductase (Fragment)                                                                             |
|                            | Os08g0508800 | 0.212558447 | 0.559111268 | 0.220930288 | 0.954835412 | Lipoxygenase, chloroplast<br>precursor (EC 1.13.11.12)                                                                                    |
